# Supplementary material for: An observational estimate of Arctic UV-absorbing aerosol direct radiative forcing on instantaneous and climatic scales
Source: Copernicus journal article supplement (doi:10.5194/egusphere-2025-80), 2025-02-05
Supplement: Supplementary file [file egusphere-2025-80-AC1-supplement.pdf]

## **Reviewer #1 Responses**

*The authors use a data-driven approach (based on long-term satellite observations + neural networks + Monte Carlo methods) to study the impact of Arctic sea ice cover on absorbing aerosol direct radiative forcing (ADRF) and reveal its long-term trend. The following issues should be addressed before publication:*

Response: we thank the reviewer for constructive comments.

- 1. The study's methodology is not highly innovative, as NN + data has been used in previous studies. However, the scientific findings seem more novel, particularly regarding the impact of sea ice on ADRF and the long-term trend. The literature review should more clearly compare this work with existing studies to confirm the novelty of the sea ice-ADRF relationship, as many GCM studies have already estimated Arctic ADRF and explored aerosol-sea ice interactions.*

**RESPONSE:** We thank the reviewer for the comments and suggestions. We have added the following text to the introduction:

“Similarly, previous studies have investigated the interactions between aerosol particles and snow- and ice-covered surfaces, with many using global climate models to determine how the deposition of absorbing particles onto sea ice and snow impacts the aerosol-radiation interactions (Bond et al., 2013; Flanner et al., 2007; Gagné et al., 2015; Schacht et al., 2019; Shindell and Faluvegi, 2009). Some studies have even investigated how changes in sea ice coverage affect aerosol radiative forcing in the Arctic. Using a global climate model, Struthers et al. (2011) found that reductions in Arctic sea ice extent led to increased emissions of sea spray/salt aerosol particles, with the associated increase in total AOD leading to stronger aerosol radiative cooling effects and a negative feedback on the Arctic climate.”

- 2. The 50+ samples used to train the NN might not be sufficient to represent all atmospheric conditions in the Arctic fully. If the NN primarily learns radiation fluxes from low-aerosol regions while the studied region has aerosols at higher altitudes, SWFcln may have systematic bias, leading to ADRF estimation errors. Stronger independent validation is needed to ensure the reliability of NN predictions.*

**RESPONSE:** We thank the reviewer for the comments and suggestions. When counting the training data in terms of the number of swaths/granules, the training dataset seems limited. However, each swath/granule contains sufficient data points with different observing conditions and viewing geometries. The dataset used for training and validation during the training process for the NN consisted of colocated L2 pixels from over 1100 OMI swaths over the Arctic across the boreal sunlit months from 2005 – 2020. This equates to about 4.4 million pixels, and after reserving 10% of the pixels for testing purposes during the training process, nearly 4 million pixels were used to train the model while 400,000 pixels were used to test the model during training.

After training the model, we used 50 swaths of co-located L2 data (independent of the training dataset) to validate the trained model, equating to about 200,000 pixels. While the initial results of validating the NN against these 50 reserved L2 swaths showed little systematic bias, we further validated the model by randomly selecting an additional 25 aerosol-free OMI swaths from the 2005 – 2020 data record. We co-located CERES, MODIS, and SSMIS data to those OMI swaths, and then added those swaths to the post-training validation dataset to determine the model's performance in these other unknown conditions. The new validation dataset thus consisted of about 300,000 pixels. The results from validating the model against CERES SWF obs for the new dataset showed similar results to the initial validation, suggesting that the model is not significantly affected by systematic biases. As we show later in response to comment #4, binning the NN errors by SSMIS surface type and MODIS COD yields little overall systematic bias as a function of those variables. We added a new Section 3.2 titled "Validation of the NN against CERES" to discuss our investigation of potential systematic biases in the NN output.

3. *In the section on neural network design on pages 11-12 (lines 300-315), the authors mention: "All nodes in the hidden layer use the Leaky Rectified Linear Unit (LeakyReLU) activation (Maas et al., 2013), with this activation function having been identified to provide the best performance after testing with other activation functions." Why does LeakyReLU provide the best performance ? It is suggested that comparative test results for different activation functions (such as ReLU, Sigmoid, etc.) be provided and that the specific advantages of LeakyReLU in handling TOA radiation flux estimation be explained.*

*RESPONSE:* We thank the reviewer for the comments and suggestions. To investigate how the LeakyReLU gives better performance than other activation functions, we retrained the model using many other activation functions and compared the mean absolute errors both during and at the end of training. The ending mean absolute errors (MAE) of the NN-predicted aerosol-free SWF against CERES SWF observations after training for 100 epochs are listed in the table below. The LeakyReLU and ReLU activation functions gave the best performance, with the ending MAE for the simulations with LeakyReLU and ReLU activation being  $2.86 \text{ Wm}^{-2}$  and  $2.92 \text{ Wm}^{-2}$ , respectively. Other models that gave good performance, but slightly worse performance than LeakyReLU, include the softplus and softsign activation functions, though the simulation with the softplus activation function exhibited some instability between epochs 60 and 80. While the simulations with ELU and SELU activation functions ended with MAE of around  $3.2 \text{ Wm}^{-2}$ , the training was highly unstable, with the errors spiking randomly between  $3.0 \text{ Wm}^{-2}$  and  $3.5 \text{ Wm}^{-2}$  with each epoch. The linear activation function provided one of the worst performances with an ending MAE of  $5.47 \text{ Wm}^{-2}$ , while training with GELU and sigmoid were stopped early because the MAE after the first about 10 epochs remained at around  $12 \text{ Wm}^{-2}$  and did not converge. Since the LeakyReLU activation function gave the best performance out of the other activation functions, we used this activation function in the NN hidden layers model during training. With the LeakyReLU activation function known to avoid the “dead neuron” problem associated with the ReLU activation function (Dubey et al., 2022; Maas et al., 2013), we suspect that this could be behind the slightly better performance of the LeakyReLU activation function than the ReLU activation function.

The following paragraph was added to the end of Section 3.1 to discuss the comparative test results of training the NN with different activation functions:

“Several experiments were conducted to determine the best activation function (AF) to use in the NN hidden layers. The NN was trained multiple times using different AFs in the hidden layer nodes, and the ending mean absolute errors (MAE) of the NN-predicted aerosol-free SWF against CERES SWF observations after training with each AF for 100 epochs are listed in Table 1. The Leaky Rectified Linear Unit (LeakyReLU, Maas et al., 2013) AF gave the best performance with an ending MAE of  $2.86 \text{ Wm}^{-2}$ , while the Rectified Linear Unit (ReLU, Nair and Hinton, 2010) AF gave the second-best performance with an ending MAE of  $2.92 \text{ Wm}^{-2}$ . With the LeakyReLU activation function known to avoid the “dead neuron” problem associated with the ReLU activation function (Dubey et al., 2022; Maas et al., 2013), we suspect that this could be behind the slightly better performance of the LeakyReLU AF relative to the ReLU AF. Other models that gave good performance, but slightly worse performance than LeakyReLU, include the softplus (Glorot et al., 2011) and softsign (Glorot and Bengio, 2010) AFs, though training with the softplus AF exhibited some instability between

epochs 60 and 80. While the experiments with Exponential Linear Unit (ELU, Clevert et al., 2016) and Scaled Exponential Linear Unit (SELU, Klambauer et al., 2017) AFs ended with MAE of around  $3.2 \text{ Wm}^{-2}$ , the training was highly unstable, with the errors spiking randomly between  $3.0 \text{ Wm}^{-2}$  and  $3.5 \text{ Wm}^{-2}$  with each epoch. The linear AF provided one of the worst performances with an ending MAE of  $5.47 \text{ Wm}^{-2}$ , while the training experiments with Gaussian Error Linear Unit (GELU, Hendrycks and Gimpel, 2016) and sigmoid AFs were stopped early because the MAE after the first about 10 epochs remained at around  $12 \text{ Wm}^{-2}$  and did not converge. Since the LeakyReLU activation function gave the best performance out of the other activation functions tested in this experiment, we used this activation function in all NN hidden layer nodes during training. Training was conducted on a GPU node for 100 epochs with a batch size of 128, an Adam optimizer (Kingma and Ba, 2017), and with back-propagational loss being derived by minimizing the mean squared error. After training for 100 epochs, the mean squared error (MSE) and mean absolute error (MAE) of the model-estimated SWF values against the training observations were  $16.9 \text{ Wm}^{-2}$  and  $2.86 \text{ Wm}^{-2}$ , respectively.”

**Table 1. Mean absolute errors (MAE) of the neural network output after training for 100 epochs with several different activation functions. Training with the sigmoid and GELU activation functions was terminated after about 10 epochs due to the extremely high MAE and the lack of convergence during the training process.**

| Activation Function | Reference                    | Mean absolute error after training for 100 epochs ( $\text{Wm}^{-2}$ ) |
|---------------------|------------------------------|------------------------------------------------------------------------|
| LeakyReLU           | (Maas et al., 2013)          | 2.86                                                                   |
| ReLU                | (Nair and Hinton, 2010)      | 2.92                                                                   |
| Softplus            | (Glorot et al., 2011)        | 2.94                                                                   |
| Softsign            | (Glorot and Bengio, 2010)    | 3.06                                                                   |
| ELU                 | (Clevert et al., 2016)       | 3.21                                                                   |
| SELU                | (Klambauer et al., 2017)     | 3.32                                                                   |
| Tanh                |                              | 4.87                                                                   |
| Linear              |                              | 5.47                                                                   |
| Sigmoid             |                              | ~12*                                                                   |
| GELU                | (Hendrycks and Gimpel, 2016) | ~12*                                                                   |

4. *Monte Carlo methods quantify uncertainty but cannot verify potential systematic biases. How can the authors confirm that NN-predicted SWF<sub>cln</sub> has no systematic bias?*

*RESPONSE:* We thank the reviewer for the comment and question. To test for systematic biases in the neural network-based estimates of ADRF, which would lead to systematic biases in the daily L3 ADRF estimates, we binned the validation dataset first by the different surface types, and then by the different COD ranges to determine if systematic biases were associated with either variable. The NN error distributions binned by the SSMIS surface type and by the MODIS COD are shown in the figure below. We found that the mean SWF errors for all of these swaths are largely small, with magnitudes primarily less than 3  $\text{Wm}^{-2}$ . The peaks of nearly all the error distributions for the different surface types and CODs are around 0, suggesting little systematic bias in the system overall associated with the different surface types and CODs. The mean error for the land distribution is slightly larger at  $-5.5 \text{ Wm}^{-2}$ , suggesting a slight negative bias over land. We suspect that this is related to the lack of information about the land-based surface type in the system. For example, if the NN is primarily trained on dark land surfaces, but it is applied to brighter-than-normal land surfaces (e.g. snow- and ice-covered land), the NN will predict lower upwelling SWF than is actually seen by CERES. When excluding data from April and May from this analysis, the mean error for the over-land data is much smaller, supporting our hypothesis that the slight negative shift in the land-based error distribution is related to the land surface brightness that is unaccounted for in this system. Given that the majority of the smoke events analyzed in the study occurred in the summer months (June – August), we do not expect this potential low bias of the NN over bright land surfaces to significantly impact the results of our study.

We have added the following text and figure to the paper:

### 3.2 “Validation of the NN against CERES

Once trained, the NN was first applied to the 50 reserved aerosol-free validation swaths (independent from the 131 aerosol swaths) to validate the NN output against CERES observations. The 50 validation swaths contained about 200,000 pixels to use for validation; we note that similar validation results were obtained when increasing the size of the validation dataset to about 300,000 pixels by adding 25 additional aerosol-free OMI swaths (and co-located MODIS, SSMIS, and CERES data) randomly chosen from the 2005 – 2020 boreal summer study period. Errors were calculated between the NN-estimated aerosol-free SWF and the associated CERES TOA SWF observations, and the distribution of the errors from the 50 validation swaths is shown in **Figure 1a**. The error distribution peaks at about 0  $\text{Wm}^{-2}$ , suggesting little overall bias in the NN-estimated aerosol-free SWF values. To further test for systematic biases in the NN-estimated aerosol-free SWF, we binned the validation dataset first by the SSMIS SIC and surface type, and then by MODIS COD. The NN error distributions binned by the SSMIS surface type and the MODIS COD are shown in **Figure 1b** and **Figure 1c**, respectively. We found that the mean SWF errors for the error distributions binned by SSMIS SIC and MODIS COD are largely small, with magnitudes primarily less than 3  $\text{Wm}^{-2}$ . The peaks of nearly all the error distributions for the different surface types and CODs are around 0  $\text{Wm}^{-2}$ , suggesting little systematic bias

in the system associated with the different surface types and CODs. The mean error for the land distribution (**Figure 1b**, brown) is slightly larger at  $-5.5 \text{ Wm}^{-2}$ , suggesting a slight negative bias over land. We suspect that this is related to the lack of information about the land-based surface type in the system. If the NN is primarily trained on dark land surfaces, but it is applied to brighter-than-normal land surfaces (e.g. snow- and ice-covered land), the NN will predict lower upwelling SWF than is observed by CERES. When excluding data from April and May from this analysis, the mean error for the over-land data is much smaller, supporting our hypothesis that the slight negative shift in the land-based error distribution is related to the land surface brightness that is unaccounted for in this system. Given that the majority of the smoke events analyzed in the study occurred in the summer months (June – August), we do not expect this potential low bias of the NN over bright land surfaces to significantly impact the results of our study.”

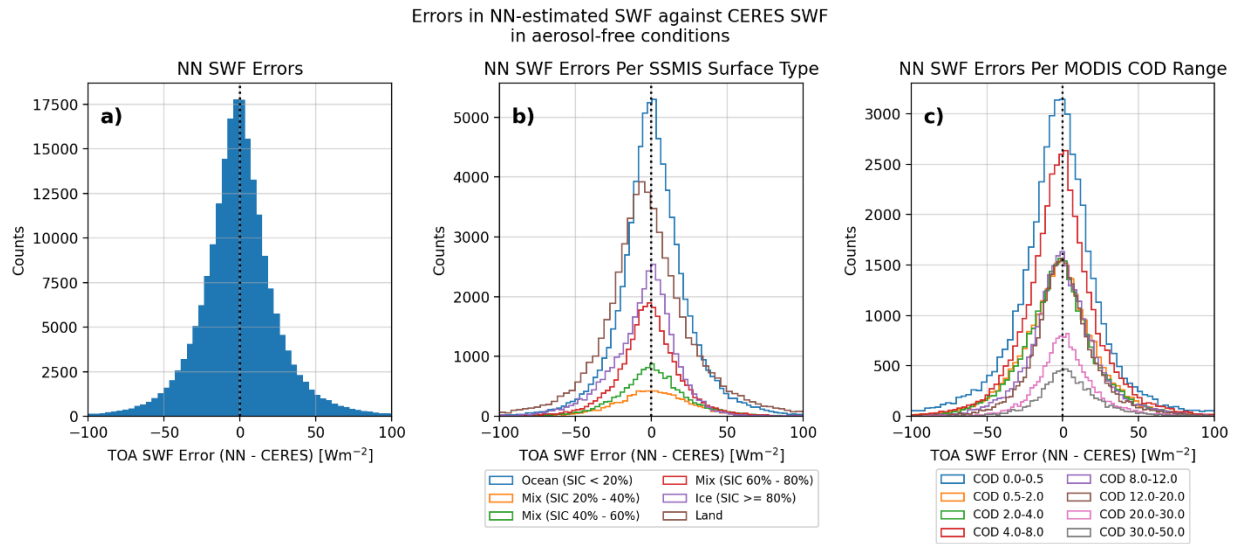

**Figure 1.** a) Distribution of errors in the neural network (NN)-estimated aerosol-free shortwave flux (SWF) relative to CERES TOA upwelling SWF observations for the 50 validation swaths reserved from the NN training dataset. b) As in (a), but with the errors binned by the SSMIS sea ice concentration (SIC) and surface type. c) As in (a), but with the errors binned by MODIS cloud optical depth (COD).

5. *Can Figure 2 include quantitative data on misclassification, such as the percentage of smoke misidentified as clouds?*

**RESPONSE:** We thank the reviewer for the question. After collocating the MODIS L1B cloud mask data to the OMI data for the swath shown in Figure 2, we calculated the number of smoky OMI pixels (defined as OMI UVAI > 1.0) for which the colocated MODIS cloud type was incorrect (i.e. pixels that should be “clear” being classified otherwise). We found that the co-located MODIS L1B cloud type classification was incorrect for about 25% of the smoky OMI pixels in this case. We note that this

misclassification only happens for very optically dense smoke plumes, which are low probability events over polar regions. So, the number calculated from Figure 2 might not be representative. For this reason, we didn't add this number to Figure 2.

6. *Why does ADRF shift from negative (cooling) to positive (warming) at a critical sea ice concentration of approximately 60%? Why is 60% the turning point? How does aerosol-surface multiple scattering influence ADRF?*

**RESPONSE:** We thank the reviewer for the comments and questions. To further investigate the 60% sea ice concentration (SIC) threshold beyond which the ADRF shifts from negative (cooling) to positive (warming), we replotted the binned L2 UVAI vs ADRF results from Figure 7, but with several other SIC bin sizes and bin centers. For example, we rebinned the ADRF data using SIC bin widths of 5%, 10%, 15%, and 20%, and with bin edges of both 60% and 65% (in other words, SIC bins around the 60% critical threshold include 40% - 60%, 45% - 65%, 45% - 60%, 50% - 65%, 50 - 60%, 55 - 65%, etc.). The critical SIC threshold was found to be 60% in most of the recalculations, with the others having the threshold at the 65% bin. Thus, we are confident that the critical SIC threshold is between 60% - 65%. We have modified the text in Section 4.1 to reflect this added confidence: "...positive between the 40% - 60% and 60% - 80% bins, or roughly a SIC of 60% (*we note that a similar threshold of 60% - 65% is also found when binning the ADRF data using a variety of other SIC bin sizes and bin edges*)."

We have also added the following text to point 2 in the conclusions: "... though the ADRF over mixed ice/ocean surfaces is still rather mild due to lack of albedo contrast between the aerosol particles and the surface beneath. *We note that a similar threshold of 60% - 65% is still found when using a variety of other SIC bin sizes and bin edges.* Over primarily sea ice scenes..."

We are also curious as to why an SIC of 60 - 65% represents the turning point between TOA warming and cooling effects of lofted absorbing aerosol particles, and about the impacts of aerosol-surface multiple scattering on the ADRF results. In theory, this is related to the relative reflectance/scattering properties of the surface and aerosol layer (e.g. a bright aerosol layer over a darker surface versus a dark aerosol layer over a brighter surface). Such a study to investigate these phenomena would require extensive radiative transfer model simulations using varying sea ice concentrations, atmospheric temperature and moisture profiles, cloud properties, and aerosol properties (with observations needed to quantify the aerosol properties over the multiple surface types in the Arctic), which would go beyond the scope of

this study and make this study much longer than it already is. While this is a very interesting research question that warrants further study, we leave this to future work and simply report the identified critical threshold here. We have added the following paragraph to the end of the conclusions section:

“While we identified that the TOA radiative impacts of a lofted plume of absorbing aerosol particles change from cooling (i.e. scene brightening) to warming (i.e. scene darkening) above a critical SIC threshold of 60% - 65%, this raises several questions that are unanswered in this study. We do not know precisely why 60% – 65% represents the critical threshold. Additionally, we do not know how other phenomena, such as multiple scattering between the aerosol layer and the ice surface, impact the TOA forcing characteristics. Studies to investigate such questions would require extensive radiative transfer model simulations using varying sea ice concentrations, atmospheric temperature and moisture profiles, cloud properties, and aerosol properties (with observations needed to quantify the aerosol properties over the multiple surface types in the Arctic), which would go beyond the scope of this study. These are very interesting research questions that warrant further study, but we leave them to future work.”

## **References**

Bond, T. C., Doherty, S. J., Fahey, D. W., Forster, P. M., Berntsen, T., DeAngelo, B. J., Flanner, M. G., Ghan, S., Kärcher, B., Koch, D., Kinne, S., Kondo, Y., Quinn, P. K., Sarofim, M. C., Schultz, M. G., Schulz, M., Venkataraman, C., Zhang, H., Zhang, S., Bellouin, N., Guttikunda, S. K., Hopke, P. K., Jacobson, M. Z., Kaiser, J. W., Klimont, Z., Lohmann, U., Schwarz, J. P., Shindell, D., Storelvmo, T., Warren, S. G., and Zender, C. S.: Bounding the role of black carbon in the climate system: A scientific assessment, *J. Geophys. Res. Atmospheres*, 118, 5380–5552, <https://doi.org/10.1002/jgrd.50171>, 2013.

Clevert, D.-A., Unterthiner, T., and Hochreiter, S.: Fast and Accurate Deep Network Learning by Exponential Linear Units (ELUs), *International Conference on Learning Representations*, arXiv:1511.07289 [cs], <https://doi.org/10.48550/arXiv.1511.07289>, 2016.

Dubey, S. R., Singh, S. K., and Chaudhuri, B. B.: Activation functions in deep learning: A comprehensive survey and benchmark, *Neurocomputing*, 503, 92–108, <https://doi.org/10.1016/j.neucom.2022.06.111>, 2022.

Flanner, M. G., Zender, C. S., Randerson, J. T., and Rasch, P. J.: Present-day climate forcing and response from black carbon in snow, *J. Geophys. Res. Atmospheres*, 112, <https://doi.org/10.1029/2006JD008003>, 2007.



Gagné, M.-È., Gillett, N. P., and Fyfe, J. C.: Impact of aerosol emission controls on future Arctic sea ice cover, *Geophys. Res. Lett.*, 42, 8481–8488, <https://doi.org/10.1002/2015GL065504>, 2015.

Glorot, X. and Bengio, Y.: Understanding the difficulty of training deep feedforward neural networks, in: *Proceedings of the Thirteenth International Conference on Artificial Intelligence and Statistics, Proceedings of the Thirteenth International Conference on Artificial Intelligence and Statistics*, 249–256, 2010.

Glorot, X., Bordes, A., and Bengio, Y.: Deep Sparse Rectifier Neural Networks, in: *Proceedings of the Fourteenth International Conference on Artificial Intelligence and Statistics, Proceedings of the Fourteenth International Conference on Artificial Intelligence and Statistics*, 315–323, 2011.

Hendrycks, D. and Gimpel, K.: Gaussian Error Linear Units (GELUs), <https://doi.org/10.48550/arXiv.1606.08415>, 2016.

Kingma, D. P. and Ba, J.: Adam: A Method for Stochastic Optimization, <https://doi.org/10.48550/arXiv.1412.6980>, 29 January 2017.

Klambauer, G., Unterthiner, T., Mayr, A., and Hochreiter, S.: Self-Normalizing Neural Networks, *Neural Inf. Process. Syst. NIPS*, 971–980, <https://doi.org/10.48550/arXiv.1706.02515>, 2017.

Maas, A. L., Hannun, A. Y., and Ng, A. Y.: Rectifier Nonlinearities Improve Neural Network Acoustic Models, in: *Proceedings of the 30th International Conference on Machine Learning, International Conference on Machine Learning, Atlanta, GA, 3*, 2013.

Nair, V. and Hinton, G. E.: Rectified linear units improve restricted boltzmann machines, in: *Proceedings of the 27th International Conference on Machine Learning, International Conference on Machine Learning, Haifa, Israel*, 807–814, <https://doi.org/10.5555/3104322.3104425>, 2010.

Schacht, J., Heinold, B., Quaas, J., Backman, J., Cherian, R., Ehrlich, A., Herber, A., Huang, W. T. K., Kondo, Y., Massling, A., Sinha, P. R., Weinzierl, B., Zannatta, M., and Tegen, I.: The importance of the representation of air pollution emissions for the modeled distribution and radiative effects of black carbon in the Arctic, *Atmospheric Chem. Phys.*, 19, 11159–11183, <https://doi.org/10.5194/acp-19-11159-2019>, 2019.

Shindell, D. and Faluvegi, G.: Climate response to regional radiative forcing during the twentieth century, *Nat. Geosci.*, 2, 294–300, <https://doi.org/10.1038/ngeo473>, 2009.

Struthers, H., Ekman, A. M. L., Glantz, P., Iversen, T., Kirkevåg, A., Mårtensson, E. M., Selander, Ø., and Nilsson, E. D.: The effect of sea ice loss on sea salt aerosol concentrations and the radiative balance in the Arctic, *Atmospheric Chem. Phys.*, 11, 3459–3477, <https://doi.org/10.5194/acp-11-3459-2011>, 2011.
